# Supplementary material
Source: Springer Nature journal article supplement (https://www.springermedizin.de/resource/supplementary/12885_2011_2727_MOESM5_ESM.pdf/9461908)

**A.**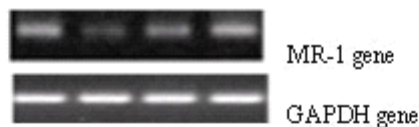**B.**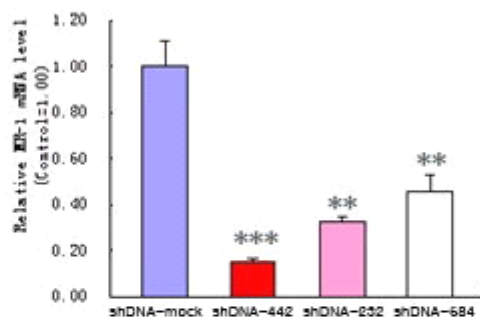**C.**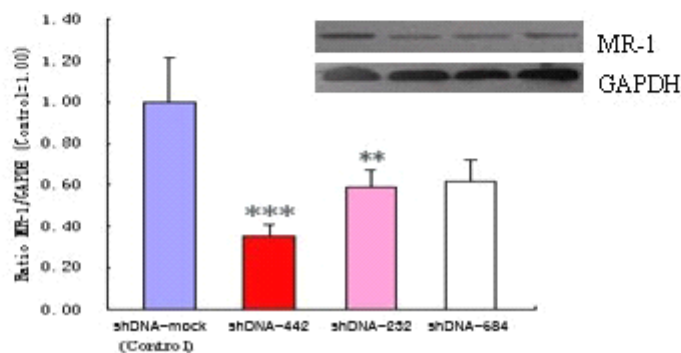**D.**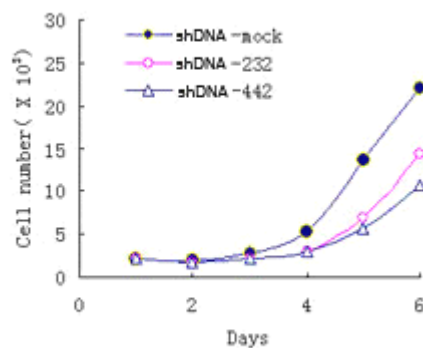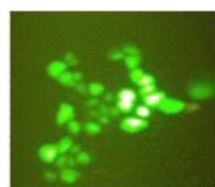

SKOV3-mock-shDNA

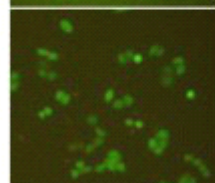

SKOV3-shDNA-442

Supplement: MOESM5 [file 9461908]
